# Supplementary material for: Mg and Zn co-doped mesoporous ZSM-5 as an ideal catalyst for ethane dehydroaromatization reaction
Source: Royal Society of Chemistry journal article supplement (doi:10.1039/d2cy01129h), 2022-01-01
Supplement: d2cy01129h1.pdf [file d2cy01129h1.pdf]

## Supplementary Information

# Mg and Zn co-doped mesoporous ZSM-5 as an ideal catalyst for ethane dehydroaromatization reaction

Tomoka Sumi,<sup>a</sup> Shinya Kokuryo,<sup>a</sup> Yugo Fujimoto,<sup>a</sup> Xinyu Li,<sup>a</sup> Koji Miyake,<sup>\*a</sup> Yoshiaki Uchida,<sup>a</sup> and Norikazu Nishiyama<sup>a</sup>

*Division of Chemical Engineering, Graduate School of Engineering Science, Osaka University, 1-3*

*Machikaneyama, Toyonaka, Osaka 560-8531, Japan.*

*E-mail: [kojimiya@cheng.es.osaka-u.ac.jp](mailto:kojimiya@cheng.es.osaka-u.ac.jp)*

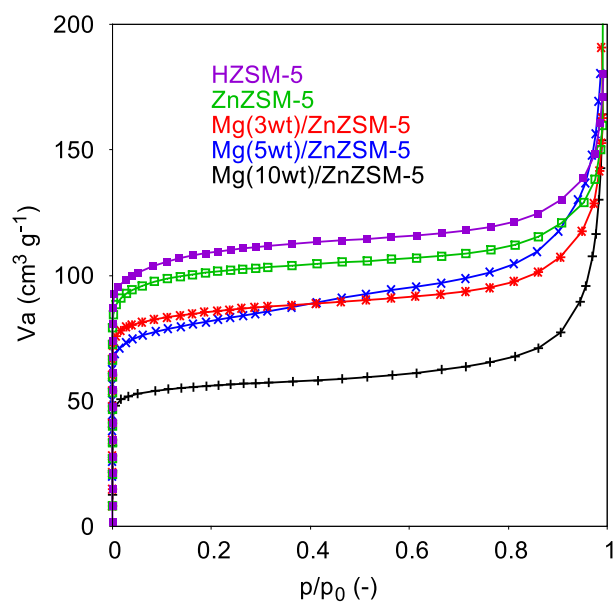

**Figure S1** N<sub>2</sub> Adsorption isotherms of the prepared samples: HZSM-5, ZnZSM-5, Mg/HZSM-5 and Mg/ZnZSM-5 with different loading amount of Mg.

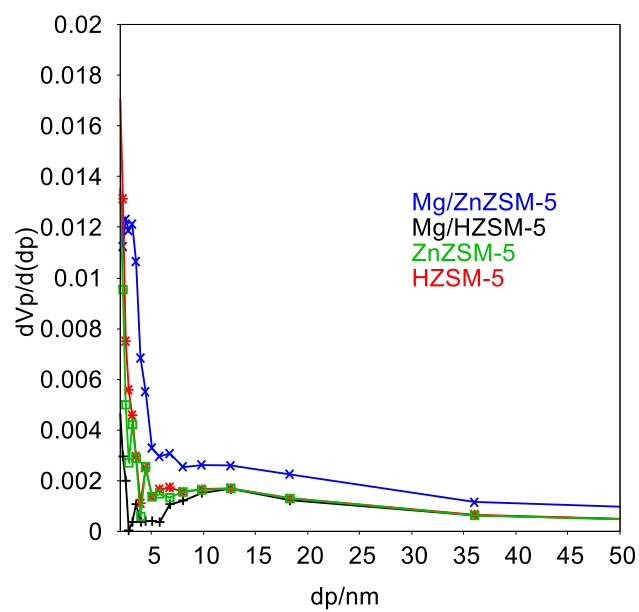

**Figure S2** Mesopore size distribution of the prepared samples, measured by N<sub>2</sub> adsorption isotherms.

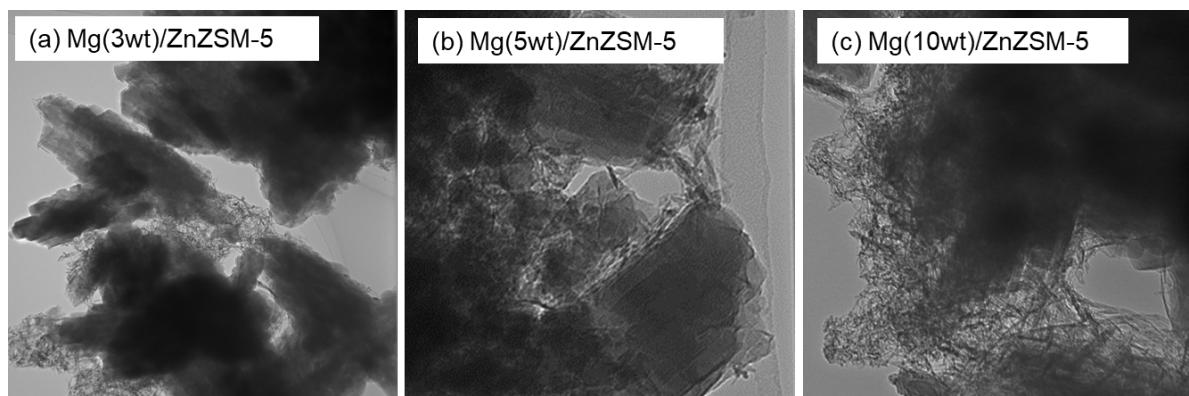

**Figure S3** TEM images of Mg/ZnZSM-5 with different loading amount of Mg: (a) 3wt, (b) 5wt and (c) 10wt.

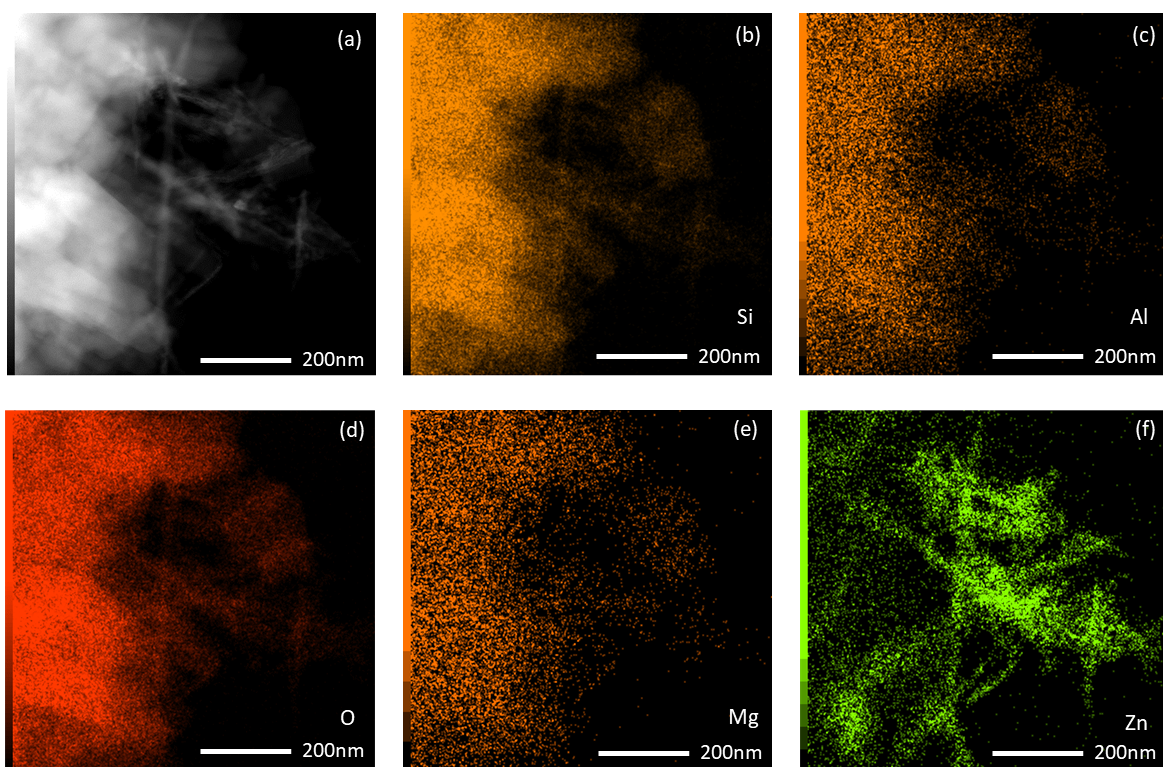

**Figure S4** STEM-EDS for Mg/ZnZSM-5: (a) STEM images, (b) - (f) Spatial mapping of each element.

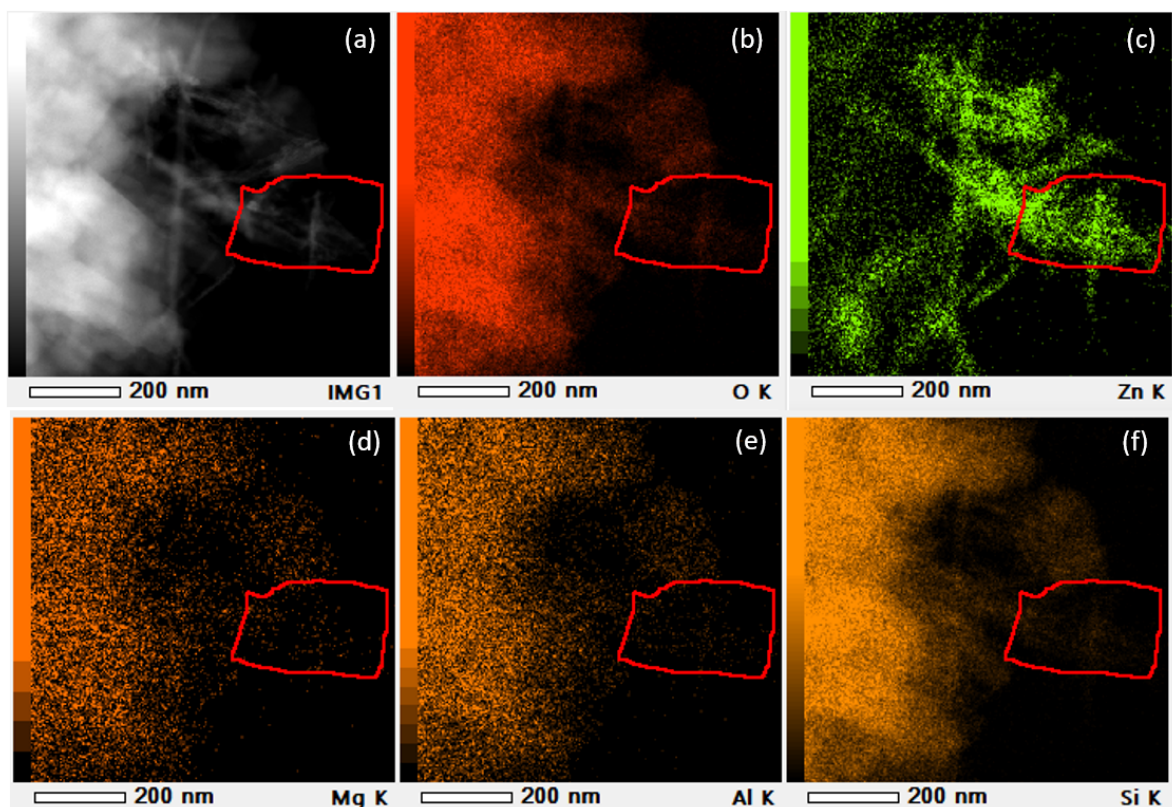

**Figure S5** Local elemental analysis of Mg/ZnZSM-5 by STEM-EDS: (a) STEM images, (b) - (f) Spatial mapping of each element.

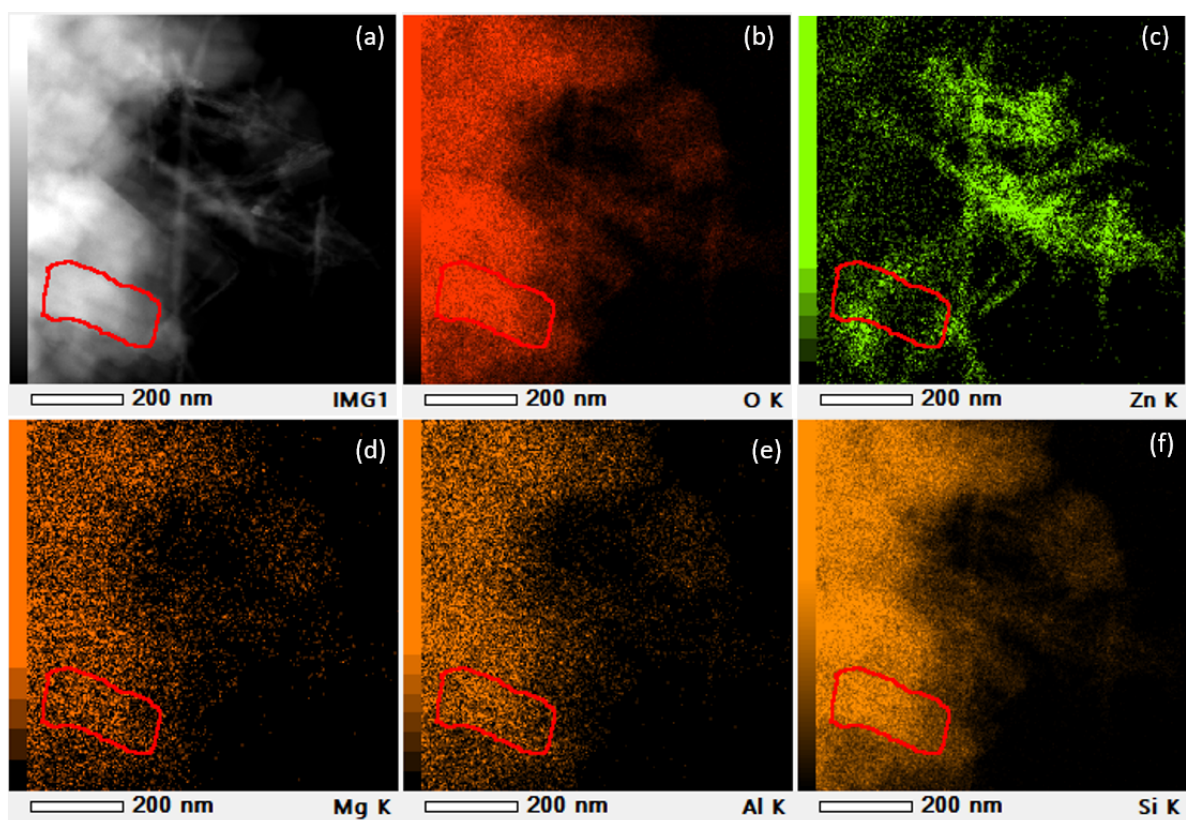

**Figure S6** Local elemental mapping of Mg/ZnZSM-5 by STEM-EDS: (a)STEM image, (b) - (f) Spatial mapping of each element.

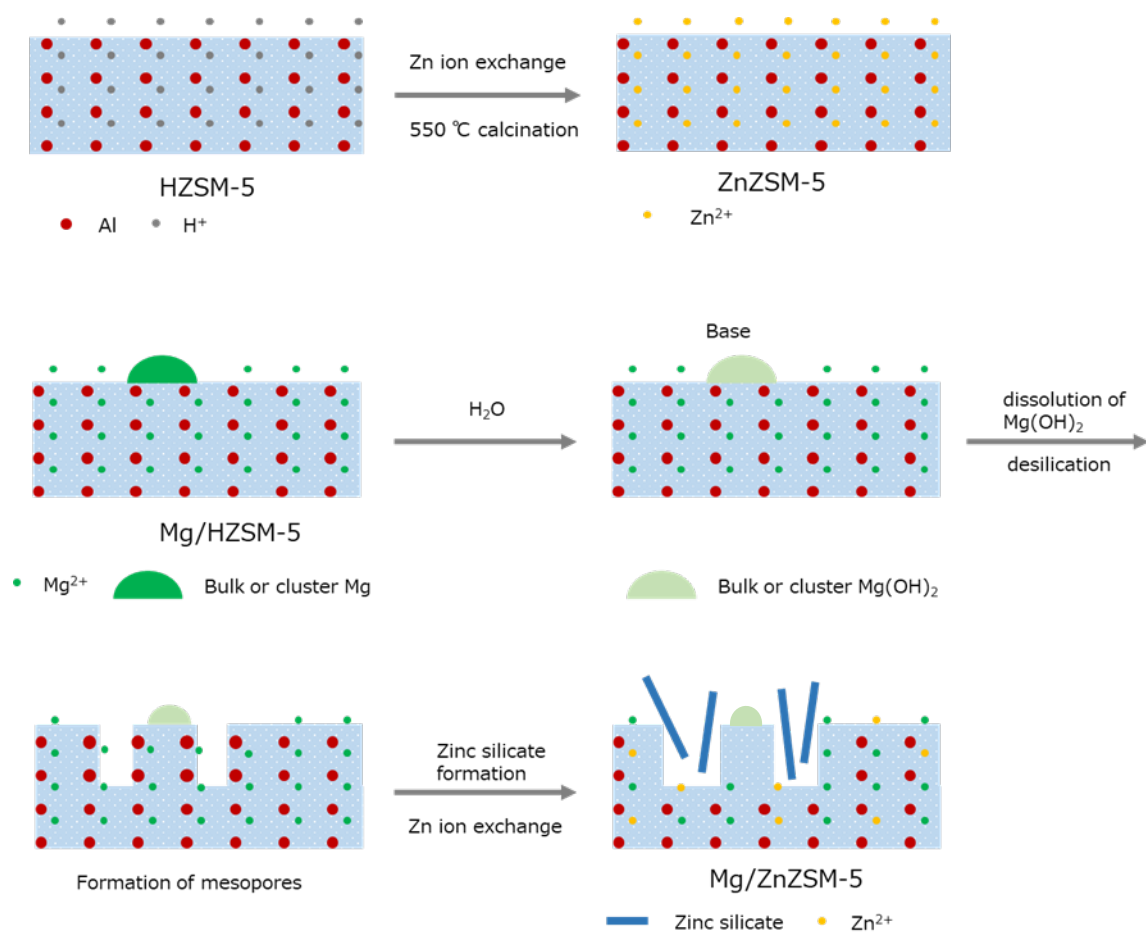

**Figure S7** The possible morphology changes in ZnZSM-5 and Mg/ZnZSM-5.



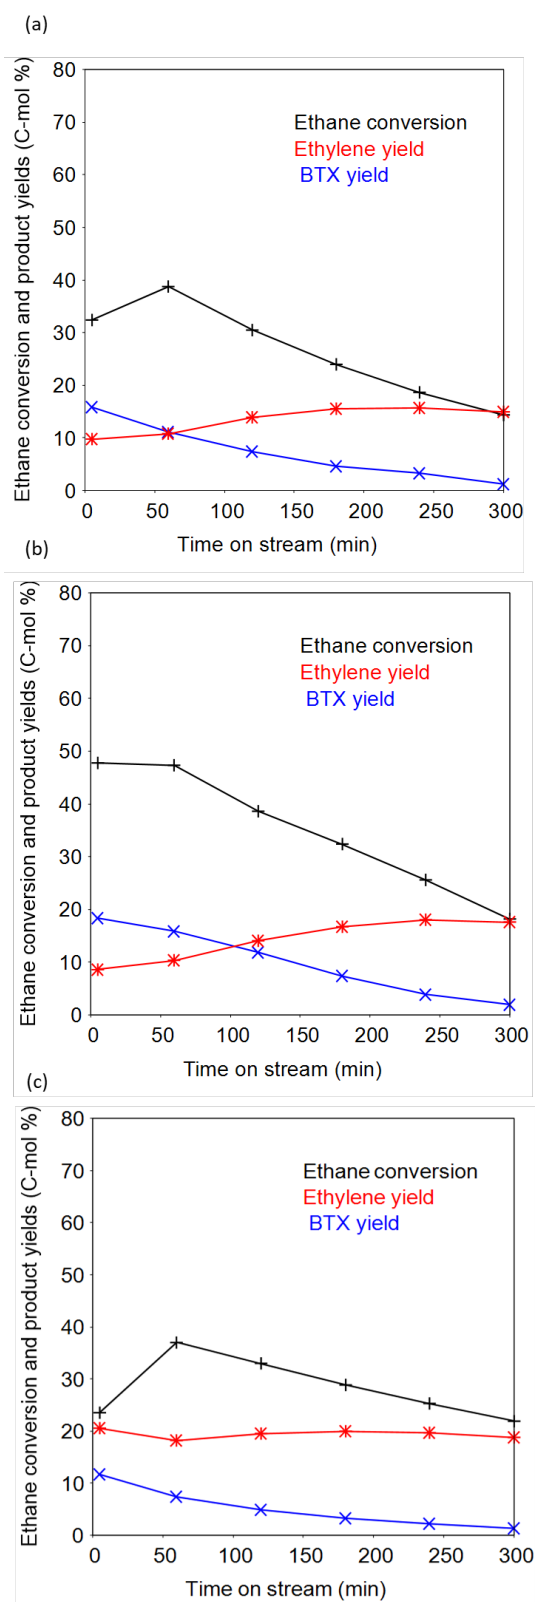

**Figure S8** The time course of the conversion of ethane and the product yields over Mg/ZnZSM-5 with different loading amount of Mg (a) 3wt, (b) 5wt and (c) 10wt.

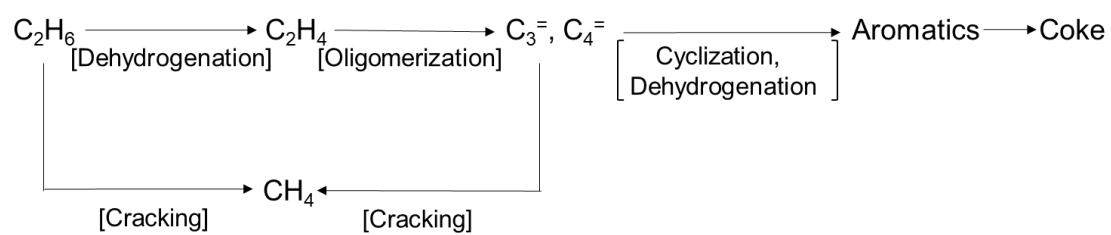

**Figure S9** The possible reaction scheme of dehydroaromatization of ethane.

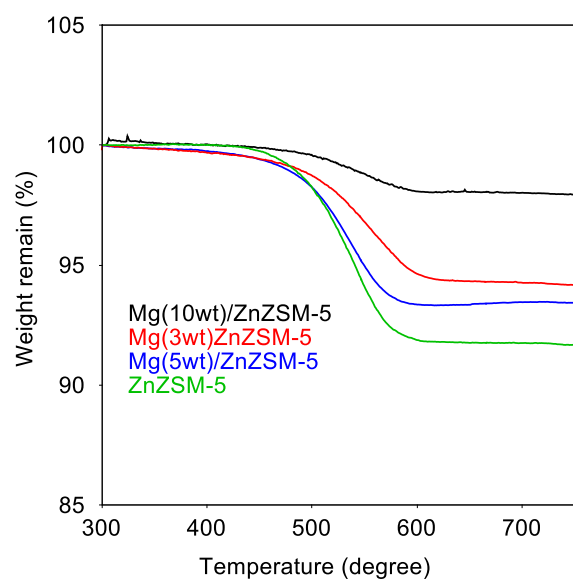

**Figure S10** TG curves of spent Mg/ZnZSM-5 with different loading amount of Mg and ZnZSM-5.

**Table S1** Composition of Mg/ZnZSM-5 with different loading amount of Mg.

| sample           | Molar ratios |       |       |
|------------------|--------------|-------|-------|
|                  | Si/Al        | Zn/Al | Mg/Al |
| Mg(3wt)/ZnZSM-5  | 9.40         | 0.39  | 0.53  |
| Mg(5wt)/ZnZSM-5  | 8.73         | 1.19  | 0.56  |
| Mg(10wt)/ZnZSM-5 | 8.30         | 0.93  | 1.79  |

**Table S2** Partial composition of Mg/ZnZSM-5 (Figure S4).

| element | Weight (%) | Atom (%) |
|---------|------------|----------|
| O       | 37.91      | 58.63    |
| Mg      | 0.30       | 0.31     |
| Al      | 0.54       | 0.49     |
| Si      | 25.67      | 22.61    |
| Zn      | 32.11      | 12.15    |

**Table S3** Partial composition of Mg/ZnZSM-5 (FigureS5).

| element | Weight (%) | Atom (%) |
|---------|------------|----------|
| O       | 48.46      | 62.35    |
| Mg      | 1.69       | 1.43     |
| Al      | 1.82       | 1.39     |
| Si      | 44.92      | 32.92    |
| Zn      | 2.37       | 0.75     |

**Table S4** Initial product yields (TOS: 5 min) of HZSM-5, ZnZSM-5, Mg/HZSM-5 and Mg/ZnZSM-5.

| Yields (C-mol %)                      | catalyst |         |           |            |
|---------------------------------------|----------|---------|-----------|------------|
|                                       | HZSM-5   | ZnZSM-5 | Mg/HZSM-5 | Mg/ZnZSM-5 |
| C <sub>2</sub> =                      | 7.01     | 5.20    | 2.59      | 8.66       |
| C <sub>3</sub> =                      | 0.75     | 0.35    | 0.42      | 0.43       |
| C <sub>4</sub> =                      | 0.085    | 0.95    | 0.16      | 0.18       |
| C <sub>1</sub> -C <sub>4</sub> alkane | 1.55     | 16.57   | 0.10      | 15.48      |
| C <sub>5</sub> > *                    | 0.065    | 0.10    | 0.004     | 0.027      |
| Benzene                               | 0.11     | 7.78    | 0         | 9.47       |
| Toluene                               | 0.097    | 5.89    | 0         | 7.35       |
| Xylene                                | 0        | 1.30    | 0         | 1.55       |
| Other Aroma                           | 0        | 0.88    | 0         | 0.33       |

\*Aromatics are not included in yield of C<sub>5</sub>>.
